# Supplementary material for: Quantification of Ash and Moisture in Wheat Flour by Raman Spectroscopy
Source: PubMed Central journal article supplement (PMC7143060; doi:10.3390/foods9030280), 2020-03-03
Supplement: foods-09-00280-s001.pdf [file foods-09-00280-s001.pdf]

# Quantification of ash and moisture in wheat flour by FT-Raman spectroscopy

Tomasz Czaja <sup>1,2</sup>, Aldona Sobota <sup>3</sup> and Roman Szostak <sup>1\*</sup>

- Department of Chemistry, University of Wrocław, 14F. Joliot-Curie, 50-383 Wrocław, Poland
- Department of Food Science, University of Copenhagen, Rolighedsvej 26, 1958, Frederiksberg, Denmark
- Engineering and Cereals Technology Department, University of Life Sciences in Lublin, Skromna 8, 20-704 Lublin, Poland

## Supplementary Materials

### List of content:

- **Table S1** Ash and moisture content in the products of milling; in % (w/w)
- **Table S2** Ash and moisture content in the analyzed samples; in % (w/w)
- **Table S3** Calibration parameters of the PLS model for ash quantification in the 0.5-5% range
- **Table S4** Elemental composition of the analyzed samples; in % (w/w)
- **Figure S1** Mill flow for common wheat (*Triticum aestivum*) using the Sadkiewicz Laboratory mill
- **Figure S2** Regression coefficients plots for PLS modeling of ash, moisture and protein
- **Figure S3** Prediction plot and regression residuals for ash quantification in the 0.5-5% range based on FT-Raman spectra
- **Figure S4** Prediction plot and regression residuals for nitrogen quantification based on FT-Raman spectra
- **Figure S5** Prediction plot and regression residuals for carbon quantification based on FT-Raman spectra
- **Figure S6** Prediction plot and regression residuals for sulfur quantification based on FT-Raman spectra
- **Figure S7** Prediction plot and regression residuals for oxygen quantification based on FT-Raman spectra

**Table S1** Ash and moisture content in the products of milling; in % (w/w)

| Wheat cultivar | Ash     |         |         |         |             | Moisture |         |         |         |             |
|----------------|---------|---------|---------|---------|-------------|----------|---------|---------|---------|-------------|
|                | Flour A | Flour B | Flour C | Flour D | Bran/shorts | Flour A  | Flour B | Flour C | Flour D | Bran/shorts |
| Kamelia        | 0.68    | 0.56    | 0.79    | 1.09    | 5.14        | 7.80     | 9.14    | 8.43    | 8.07    | 7.01        |
| Katoda         | 0.64    | 0.54    | 0.86    | 1.12    | 4.61        | 12.33    | 14.3    | 12.73   | 10.33   | 9.38        |
| Monsun         | 0.61    | 0.54    | 0.79    | 1.04    | 5.16        | 14.80    | 13.83   | 8.58    | 12.06   | 12.8        |
| Nawra          | 0.71    | 0.64    | 0.93    | 1.34    | 4.50        | 12.43    | 14.11   | 11.24   | 9.20    | 8.52        |
| Ostka Smolicka | 0.69    | 0.54    | 0.87    | 1.14    | 4.43        | 13.96    | 13.24   | 8.67    | 9.59    | 8.79        |
| Raweta         | 0.70    | 0.59    | 0.89    | 1.09    | 4.84        | 13.48    | 11.77   | 10.33   | 8.63    | 7.90        |
| Goplana        | 0.71    | 0.58    | 0.83    | 1.12    | 4.72        | 10.92    | 8.55    | 8.69    | 7.85    | 7.58        |
| Tybalt         | 0.72    | 0.57    | 0.81    | 1.24    | 3.75        | 13.23    | 13.29   | 8.00    | 9.28    | 6.30        |
| Fala           | 0.62    | 0.59    | 0.81    | 1.01    | 5.31        | 11.57    | 9.64    | 9.46    | 9.10    | 7.98        |
| Kandela        | 0.73    | 0.63    | 0.87    | 1.30    | 4.23        | 13.63    | 13.52   | 11.78   | 9.23    | 10.29       |
| Bogatka        | 0.74    | 0.66    | 0.87    | 1.10    | 5.33        | 10.12    | 10.64   | 9.16    | 8.91    | 8.54        |
| Smuga          | 0.67    | 0.55    | 0.9     | 1.15    | 4.44        | 14.57    | 14.08   | 11.23   | 8.82    | 9.12        |
| Pokusa         | 0.64    | 0.58    | 0.82    | 1.33    | 4.25        | 10.86    | 9.01    | 10.55   | 10.53   | 7.71        |
| Tonacja        | 0.70    | 0.58    | 0.95    | 1.23    | 4.86        | 10.67    | 13.49   | 9.90    | 9.24    | 8.60        |
| Skagen         | 0.80    | 0.61    | 1.01    | 1.36    | 5.24        | 10.36    | 13.56   | 9.20    | 9.09    | 8.53        |

**Table S2** Ash and moisture content in the analyzed samples; in % (w/w)

| Number | Wheat cultivar | Composition of samples | Ash                | Moisture           |
|--------|----------------|------------------------|--------------------|--------------------|
| 1      | Monsun         | Flour B (100 %)        | 0.54 <sup>x</sup>  | 13.83              |
| 2      | Ostka Smolicka | Flour B (100 %)        | 0.54 <sup>vx</sup> | 13.24              |
| 3      | Katoda         | Flour B (100 %)        | 0.54 <sup>xx</sup> | 14.30              |
| 4      | Smuga          | Flour B (100 %)        | 0.55 <sup>x</sup>  | 14.08              |
| 5      | Tybalt         | Flour B (100 %)        | 0.57 <sup>vx</sup> | 13.29 <sup>v</sup> |
| 6      | Tonacja        | Flour B (100 %)        | 0.58 <sup>xx</sup> | 13.49              |
| 7      | Skagen         | Flour B (100 %)        | 0.61 <sup>x</sup>  | 13.56              |
| 8      | Fala           | Flour A (100 %)        | 0.62               | 11.57              |
| 9      | Kandela        | Flour B (100 %)        | 0.63 <sup>xx</sup> | 13.52 <sup>v</sup> |
| 10     | Nawra          | Flour B (100 %)        | 0.64 <sup>x</sup>  | 14.11              |
| 11     | Katoda         | Flour A (100 %)        | 0.64 <sup>vx</sup> | 12.33 <sup>v</sup> |
| 12     | Bogatka        | Flour B (100 %)        | 0.66 <sup>x</sup>  | 10.64 <sup>v</sup> |
| 13     | Smuga          | Flour A (100 %)        | 0.67 <sup>v</sup>  | 14.57 <sup>x</sup> |
| 14     | Ostka Smolicka | Flour A (100 %)        | 0.69 <sup>xv</sup> | 13.96              |
| 15     | Tonacja        | Flour A (100 %)        | 0.70 <sup>x</sup>  | 10.67              |
| 16     | Raweta         | Flour A (100 %)        | 0.70               | 13.48              |
| 17     | Nawra          | Flour A (100 %)        | 0.71               | 12.43              |
| 18     | Goplana        | Flour A (100 %)        | 0.71               | 10.92              |
| 19     | Tybalt         | Flour A (100 %)        | 0.72               | 13.23              |
| 20     | Kandela        | Flour A (100 %)        | 0.73 <sup>x</sup>  | 13.63              |
| 21     | Monsun         | Flour C (100 %)        | 0.79               | 8.58 <sup>x</sup>  |
| 22     | Skagen         | Flour A (100 %)        | 0.80 <sup>x</sup>  | 10.36              |
| 23     | Fala           | Flour C (100 %)        | 0.81 <sup>x</sup>  | 9.46               |
| 24     | Tybalt         | Flour C (100 %)        | 0.81 <sup>vx</sup> | 8.00 <sup>x</sup>  |
| 25     | Pokusa         | Flour C (100 %)        | 0.82 <sup>x</sup>  | 10.55              |
| 26     | Goplana        | Flour C (100 %)        | 0.83 <sup>x</sup>  | 8.69               |
| 27     | Katoda         | Flour C (100 %)        | 0.86 <sup>v</sup>  | 12.73              |
| 28     | Kandela        | Flour C (100 %)        | 0.87               | 11.78              |
| 29     | Ostka Smolicka | Flour C (100 %)        | 0.87 <sup>x</sup>  | 8.67               |
| 30     | Smuga          | Flour C (100 %)        | 0.90               | 11.23              |
| 31     | Nawra          | Flour C (100 %)        | 0.93 <sup>v</sup>  | 11.24 <sup>v</sup> |
| 32     | Tonacja        | Flour C (100 %)        | 0.95 <sup>x</sup>  | 9.90               |
| 33     | Skagen         | Flour C (100 %)        | 1.01 <sup>vx</sup> | 9.20               |
| 34     | Fala           | Flour D (100 %)        | 1.01 <sup>x</sup>  | 9.10               |
| 35     | Monsun         | Flour D (100 %)        | 1.04 <sup>x</sup>  | 12.06              |
| 36     | Kamelia        | Flour D (100 %)        | 1.09               | 13.37 <sup>x</sup> |
| 37     | Raweta         | Flour D (100 %)        | 1.09 <sup>v</sup>  | 8.63               |
| 38     | Bogatka        | Flour D (100 %)        | 1.10               | 8.91               |
| 39     | Katoda         | Flour D (100 %)        | 1.12               | 10.33 <sup>v</sup> |
| 40     | Ostka Smolicka | Flour D (100 %)        | 1.14               | 9.59               |
| 41     | Tonacja        | Flour D (100 %)        | 1.23               | 9.24               |
| 42     | Tybalt         | Flour D (100 %)        | 1.24 <sup>x</sup>  | 9.28               |
| 43     | Pokusa         | Flour D (100 %)        | 1.33 <sup>x</sup>  | 10.53              |
| 44     | Skagen         | Flour D (100 %)        | 1.36 <sup>vx</sup> | 9.09               |

|    |                |                                 |                    |                    |
|----|----------------|---------------------------------|--------------------|--------------------|
| 45 | Kamelia        | Flour C (85 %) /bran (15%)      | 1.44 <sup>x</sup>  | 8.22               |
| 46 | Kamelia        | Flour B (80 %) /bran (20 %)     | 1.48 <sup>x</sup>  | 8.71               |
| 47 | Pokusa         | Flour C (80 %) /bran (20%)      | 1.51 <sup>x</sup>  | 9.98               |
| 48 | Kamelia        | Flour A (80 %) /bran (20%)      | 1.57               | 7.64               |
| 49 | Kandela        | Flour D (90 %) /bran (10%)      | 1.59 <sup>v</sup>  | 9.34 <sup>v</sup>  |
| 50 | Kamelia        | Flour D (87.5%) /bran (12.5%)   | 1.59 <sup>v</sup>  | 7.94               |
| 51 | Bogatka        | Flour A (80 %) /bran (20 %)     | 1.66               | 9.80 <sup>v</sup>  |
| 52 | Pokusa         | Flour B (70 %) /bran (30 %)     | 1.68               | 8.49 <sup>v</sup>  |
| 53 | Goplana        | Flour B (72.7 %) /bran (27.3 %) | 1.71 <sup>v</sup>  | 8.28               |
| 54 | Raweta         | Flour D (79.5 %) /bran (20.5 %) | 1.74               | 8.44 <sup>v</sup>  |
| 55 | Goplana        | Flour D (90 %) /bran (10 %)     | 1.77 <sup>x</sup>  | 7.80               |
| 56 | Goplana        | Flour B (70.2 %) /bran (29.8 %) | 1.82 <sup>x</sup>  | 8.27               |
| 57 | Goplana        | Flour B (70 %) /bran (30 %)     | 1.82 <sup>x</sup>  | 8.26               |
| 58 | Smuga          | Flour D (78.7 %) /bran (21.3 %) | 1.85 <sup>v</sup>  | 8.88               |
| 59 | Raweta         | Flour B (70 %) /bran (30 %)     | 1.87               | 10.61              |
| 60 | Nawra          | Flour D (80 %) /bran (20 %)     | 1.97 <sup>v</sup>  | 9.06               |
| 61 | Fala           | Flour B (70 %) /bran (30 %)     | 2.01               | 9.14               |
| 62 | Skagen         | Flour D (82.5 %) /bran (17.5 %) | 2.03               | 8.99               |
| 63 | Pokusa         | Flour A (60 %) /bran (40 %)     | 2.08 <sup>v</sup>  | 9.60 <sup>x</sup>  |
| 64 | Ostka Smolicka | Flour D (70.5 %) /bran (29.5 %) | 2.11 <sup>v</sup>  | 9.34               |
| 65 | Smuga          | Flour D (70 %) /bran (30 %)     | 2.14 <sup>x</sup>  | 8.91 <sup>x</sup>  |
| 66 | Bogatka        | Flour C (70 %) /bran (30 %)     | 2.21               | 8.97 <sup>v</sup>  |
| 67 | Tybalt         | Flour D (50 %) /bran (50 %)     | 2.24               | 7.17 <sup>v</sup>  |
| 68 | Monsun         | Flour A (47 %) /bran (53 %)     | 3.02 <sup>x</sup>  | 12.90 <sup>x</sup> |
| 69 | Smuga          | Flour A (31.5 %) /bran (68.5 %) | 3.22 <sup>xv</sup> | 10.84 <sup>x</sup> |
| 70 | Monsun         | Flour D (46 %)/bran (54 %)      | 3.26 <sup>x</sup>  | 12.45 <sup>x</sup> |
| 71 | Monsun         | Flour A (40 %)/bran (60 %)      | 3.34 <sup>x</sup>  | 12.72 <sup>x</sup> |
| 72 | Kandela        | Bran (100 %)                    | 4.23 <sup>x</sup>  | 10.29 <sup>x</sup> |
| 73 | Ostka Smolicka | Bran (100 %)                    | 4.43 <sup>xv</sup> | 8.79 <sup>x</sup>  |
| 74 | Smuga          | Bran (100 %)                    | 4.44 <sup>x</sup>  | 9.12 <sup>x</sup>  |
| 75 | Katoda         | Bran (100 %)                    | 4.61 <sup>x</sup>  | 9.38 <sup>x</sup>  |
| 76 | Tonacja        | Bran (100 %)                    | 4.86 <sup>x</sup>  | 8.60 <sup>x</sup>  |
| 77 | Skagen         | Bran (100 %)                    | 5.24 <sup>x</sup>  | 8.53 <sup>x</sup>  |

<sup>v</sup> – validation sample; <sup>x</sup> – ignored sample; red color – ash in the 0.5-2.2% range; blue color – ash in the 0.5-5.2% range

**Table S3** Calibration parameters of the PLS model for ash quantification in the 0.5-5.2% range

| Parameter           |       |
|---------------------|-------|
| R                   | 0.998 |
| R <sub>cv</sub>     | 0.953 |
| RSEP <sub>cal</sub> | 3.54  |
| RSEP <sub>val</sub> | 3.59  |

**Table S4** Elemental composition of the analyzed flours; in % (w/w)

| Number | Nitrogen           | Carbon              | Sulfur             | Oxygen              |
|--------|--------------------|---------------------|--------------------|---------------------|
| 1      | 2.015 <sup>y</sup> | 41.400              | 0.075              | 49.579 <sup>x</sup> |
| 2      | 1.960 <sup>y</sup> | 40.930              | 0.097              | 50.223              |
| 3      | 2.020              | 41.175 <sup>y</sup> | 0.073 <sup>y</sup> | 49.665              |
| 4      | 1.970              | 41.440              | 0.083 <sup>y</sup> | 49.519              |
| 5      | 1.945              | 41.015              | 0.097              | 50.160              |
| 6      | 1.990              | 41.135              | 0.073              | 49.750 <sup>y</sup> |
| 7      | 1.925              | 41.065 <sup>y</sup> | 0.107              | 50.154              |
| 8      | 1.985              | 41.130              | 0.085              | 49.707              |
| 9      | 1.960              | 41.545              | 0.083              | 49.447              |
| 10     | 2.045 <sup>y</sup> | 41.265 <sup>y</sup> | 0.078              | 49.560              |
| 11     | 2.065              | 41.565              | 0.072              | 49.632 <sup>y</sup> |
| 12     | 1.985              | 41.150              | 0.083              | 49.634              |
| 13     | 2.230 <sup>x</sup> | 41.245              | 0.082              | 49.363              |
| 14     | 2.225              | 41.615              | 0.083              | 49.157              |
| 15     | 2.090 <sup>y</sup> | 41.230              | 0.087              | 50.574 <sup>x</sup> |
| 16     | 2.190              | 41.135 <sup>x</sup> | 0.100              | 49.793              |
| 17     | 2.005              | 41.410              | 0.051 <sup>x</sup> | 50.306              |
| 18     | 2.080              | 41.160              | 0.084              | 49.922              |
| 19     | 2.070              | 41.620              | 0.078              | 49.288              |
| 20     | 1.990              | 41.665              | 0.086              | 49.303              |
| 21     | 1.950              | 41.180              | 0.083              | 49.875 <sup>y</sup> |
| 22     | 2.040 <sup>x</sup> | 41.315              | 0.089 <sup>y</sup> | 49.416              |
| 23     | 2.090              | 41.275              | 0.080              | 49.396              |
| 24     | 2.045              | 41.265              | 0.091 <sup>y</sup> | 49.486              |
| 25     | 2.065              | 41.270              | 0.089              | 49.400              |
| 26     | 2.130 <sup>y</sup> | 41.325              | 0.094              | 49.364              |
| 27     | 2.195              | 41.725              | 0.083 <sup>y</sup> | 49.068              |
| 28     | 2.220              | 41.240              | 0.093              | 49.276              |
| 29     | 2.095              | 41.330              | 0.100              | 49.662              |
| 30     | 2.185 <sup>y</sup> | 41.295              | 0.092              | 49.324              |
| 31     | 2.220              | 41.345 <sup>y</sup> | 0.093 <sup>y</sup> | 49.480 <sup>y</sup> |
| 32     | 2.280              | 41.320              | 0.097              | 49.174 <sup>y</sup> |
| 33     | 2.195              | 41.375 <sup>y</sup> | 0.094              | 49.429 <sup>y</sup> |
| 34     | 2.220              | 41.295 <sup>y</sup> | 0.109 <sup>x</sup> | 49.298              |
| 35     | 2.160              | 41.590              | 0.072              | 49.349              |
| 36     | 2.275 <sup>y</sup> | 41.340              | 0.085              | 49.235              |
| 37     | 2.125              | 41.450 <sup>y</sup> | 0.087              | 49.888              |
| 38     | 2.165 <sup>y</sup> | 41.495              | 0.094 <sup>y</sup> | 49.180              |
| 39     | 2.200              | 41.455              | 0.093              | 49.344 <sup>y</sup> |
| 40     | 2.265              | 41.471              | 0.087              | 49.000              |
| 41     | 2.210              | 41.445              | 0.095              | 49.143              |
| 42     | 2.235 <sup>x</sup> | 41.510              | 0.100 <sup>y</sup> | 48.986              |
| 43     | 2.275              | 41.375              | 0.097 <sup>y</sup> | 49.456              |
| 44     | 2.270              | 41.470              | 0.108              | 49.057              |

|    |                    |                     |                    |                     |
|----|--------------------|---------------------|--------------------|---------------------|
| 45 | 2.295              | 41.735 <sup>y</sup> | 0.090              | 48.814 <sup>x</sup> |
| 46 | 2.335 <sup>y</sup> | 41.640 <sup>y</sup> | 0.138 <sup>x</sup> | 49.202 <sup>y</sup> |
| 47 | 2.250              | 41.560              | 0.097              | 48.981 <sup>y</sup> |
| 48 | 2.300              | 41.560              | 0.086              | 49.287              |
| 49 | 2.365              | 41.490 <sup>x</sup> | 0.093              | 49.102 <sup>y</sup> |
| 50 | 2.350              | 41.630 <sup>y</sup> | 0.097              | 48.854 <sup>y</sup> |
| 51 | 2.315              | 41.590              | 0.097              | 48.998              |
| 52 | 2.340 <sup>y</sup> | 41.675 <sup>y</sup> | 0.097              | 48.849              |
| 53 | 2.260              | 41.710 <sup>y</sup> | 0.097              | 49.172              |
| 54 | 2.335              | 41.660              | 0.101              | 48.847              |
| 55 | 2.265              | 41.575              | 0.100              | 49.027              |
| 56 | 2.345 <sup>x</sup> | 41.650              | 0.105              | 48.773              |
| 57 | 2.220 <sup>x</sup> | 41.760              | 0.113 <sup>y</sup> | 49.855 <sup>x</sup> |
| 58 | 2.380              | 41.340 <sup>x</sup> | 0.104              | 49.539              |
| 59 | 2.390 <sup>y</sup> | 41.755              | 0.109              | 48.735              |
| 60 | 2.335              | 41.545              | 0.095              | 49.128              |
| 61 | 2.350              | 41.660              | 0.104              | 48.882              |
| 62 | 2.435              | 41.825              | 0.104 <sup>y</sup> | 48.697 <sup>y</sup> |
| 63 | 2.475              | 41.845              | 0.101              | 48.972              |
| 64 | 2.260              | 41.605              | 0.136              | 48.973              |
| 65 | 2.450 <sup>x</sup> | 42.140 <sup>x</sup> | 0.108 <sup>y</sup> | 48.250              |
| 66 | 2.525              | 42.055              | 0.111              | 48.261              |
| 67 | 2.505 <sup>y</sup> | 42.040 <sup>x</sup> | 0.112              | 48.343              |
| 68 | 2.825              | 42.165              | 0.113              | 47.849              |
| 69 | 2.740              | 42.110 <sup>y</sup> | 0.098              | 48.076              |
| 70 | 2.765 <sup>y</sup> | 42.565              | 0.110 <sup>y</sup> | 47.620              |
| 71 | 2.760              | 42.410              | 0.101 <sup>x</sup> | 47.869              |
| 72 | 2.895 <sup>y</sup> | 42.325 <sup>y</sup> | 0.128              | 48.158 <sup>y</sup> |
| 73 | 2.970              | 42.230              | 0.133 <sup>y</sup> | 47.834 <sup>y</sup> |
| 74 | 2.745              | 42.355              | 0.135              | 47.659 <sup>x</sup> |
| 75 | 2.935              | 42.500              | 0.135              | 47.331 <sup>x</sup> |
| 76 | 3.005              | 42.215              | 0.248 <sup>x</sup> | 48.213              |
| 77 | 2.905              | 42.275 <sup>x</sup> | 0.176 <sup>x</sup> | 47.662              |

<sup>y</sup> – validation sample; <sup>x</sup> – ignored sample;

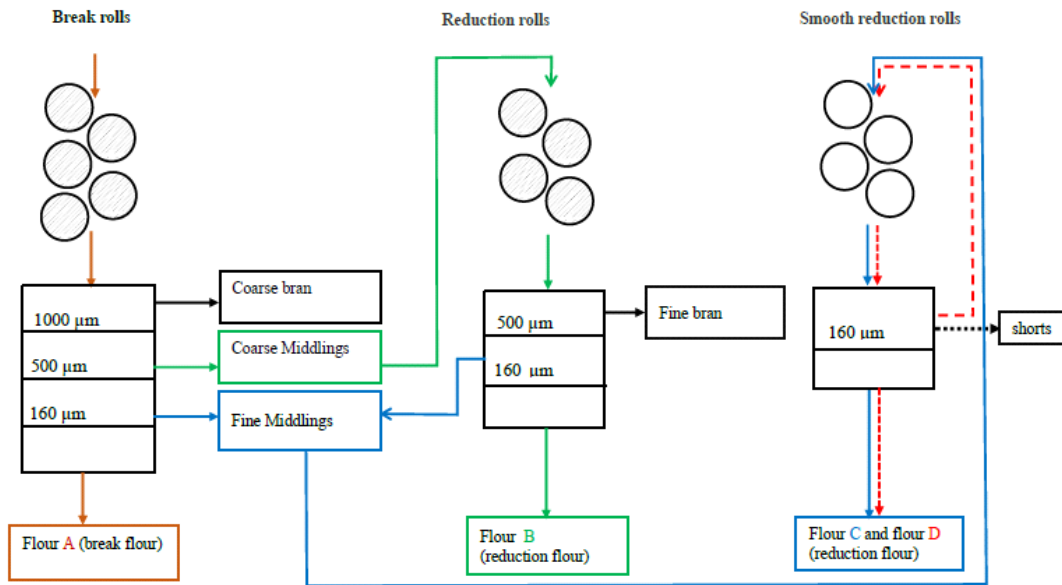

**Figure S1** Mill flow for common wheat (*Triticum aestivum*) using the Sadkiewicz Laboratory mills



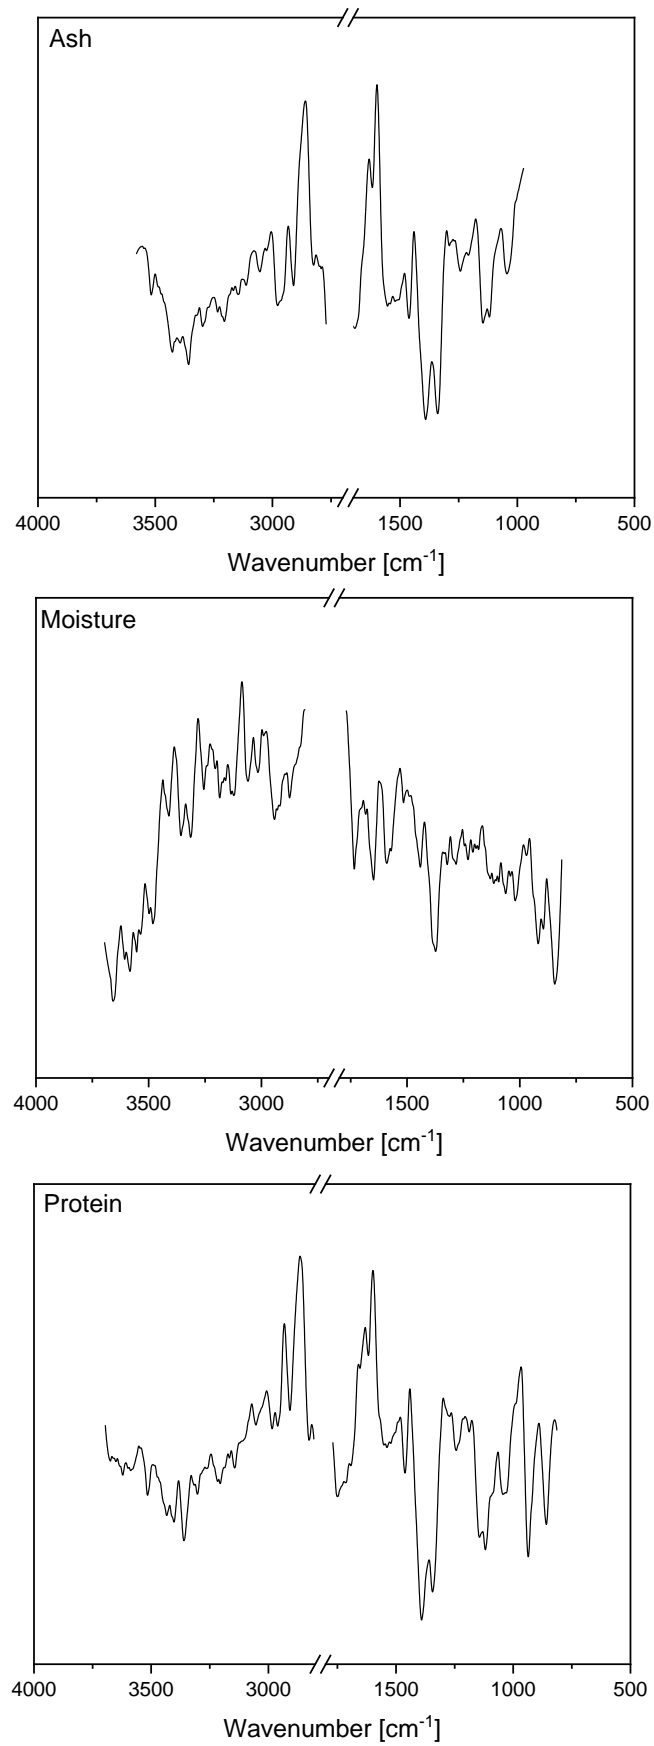

**Figure S2** Regression coefficients plots for PLS modeling of ash, moisture and protein

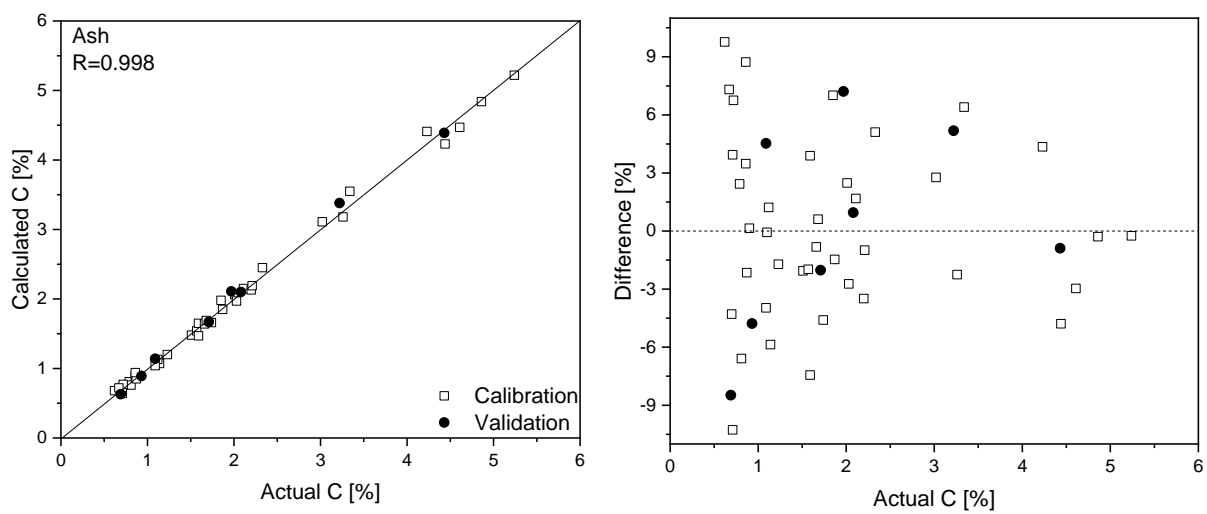

**Figure S3** Prediction plot and regression residuals for ash quantification in the 0.5-5% range based on FT-Raman spectra

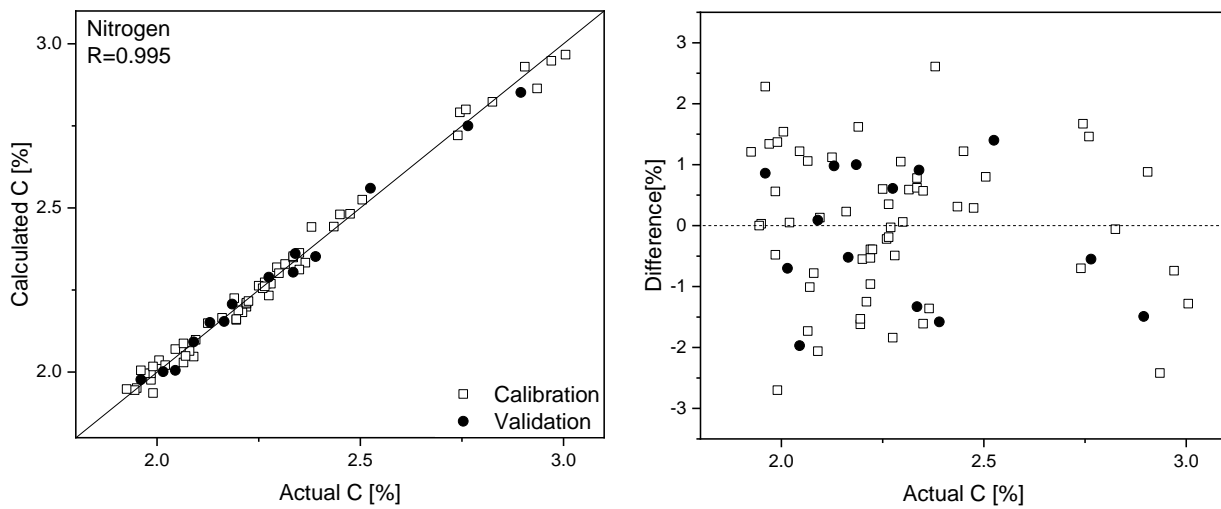

**Figure S4** Prediction plot and regression residuals for nitrogen quantification based on FT-Raman spectra

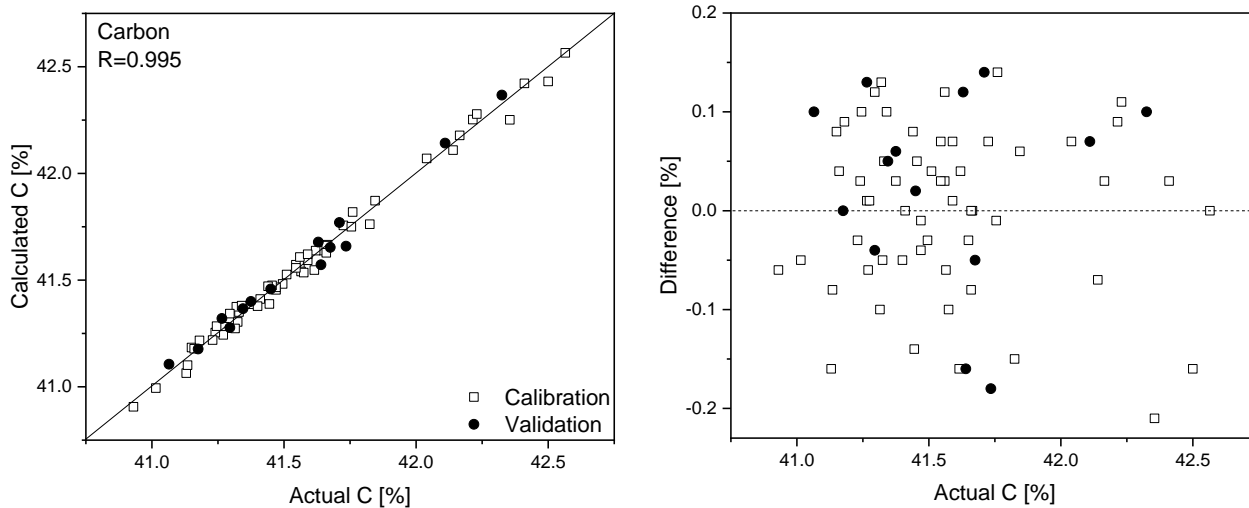

**Figure S5** Prediction plot and regression residuals for carbon quantification based on FT-Raman spectra

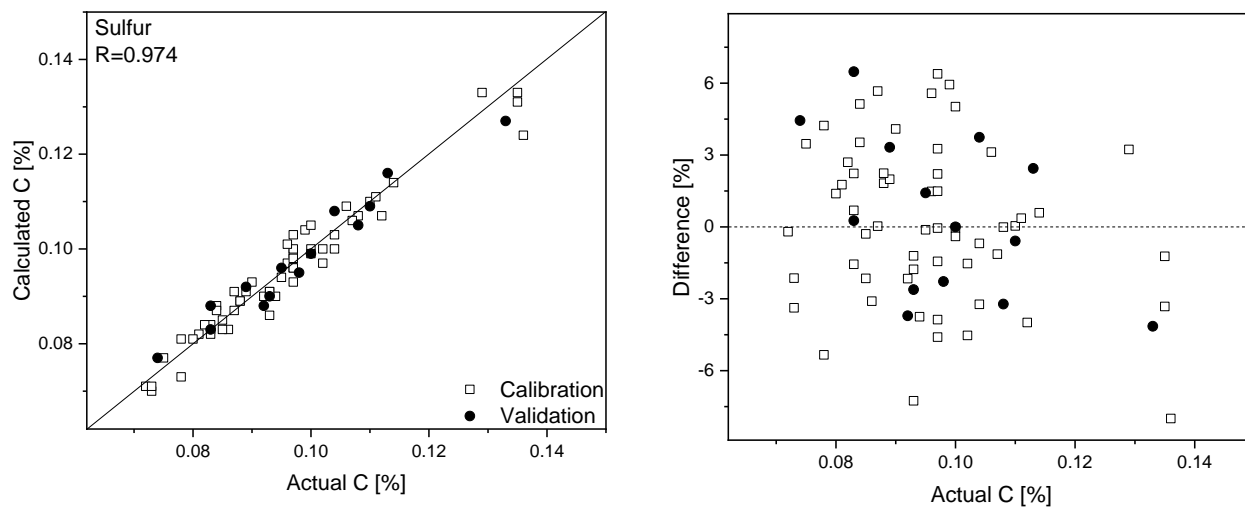

**Figure S6** Prediction plot and regression residuals for sulfur quantification based on FT-Raman spectra

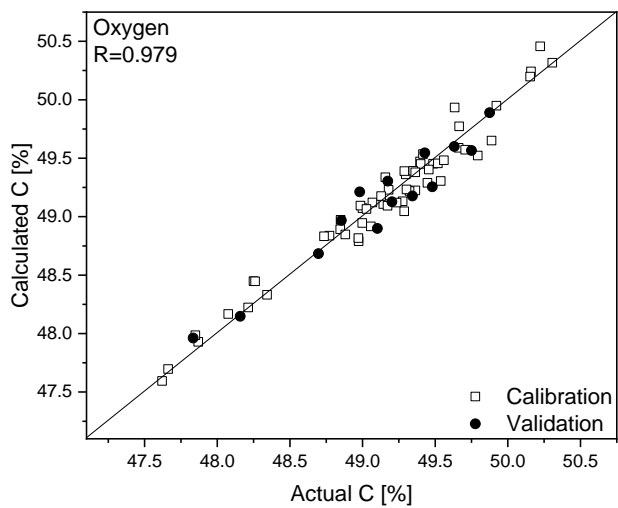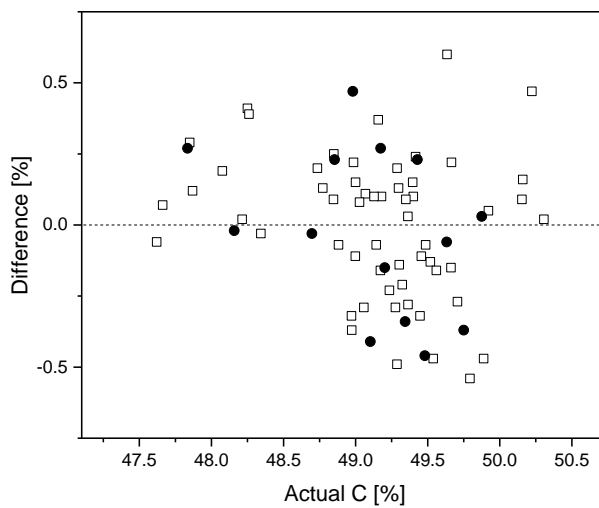

**Figure S7** Prediction plot and regression residuals for oxygen quantification based on FT-Raman spectra
